# Supplementary material for: SnSe@SnO2 core–shell nanocomposite for synchronous photothermal–photocatalytic production of clean water
Source: Royal Society of Chemistry journal article supplement (doi:10.1039/c9en00149b), 2019-01-01
Supplement: c9en00149b1.pdf [file c9en00149b1.pdf]

## Electronic Supplementary Information

### SnSe@SnO<sub>2</sub> core-shell nanocomposite for synchronous photothermal-photocatalytic production of clean water

Zhuo Li,<sup>a</sup> Lei Sun,<sup>a</sup> Yang Liu,<sup>a</sup> Lin Zhu,<sup>a</sup> Dengfeng Yu,<sup>b</sup> Yuanlin Wang,<sup>a</sup> Ye Sun,<sup>\*b</sup> and Miao Yu<sup>\*a</sup>

<sup>a</sup> State Key Laboratory of Urban Water Resource and Environment, School of Chemistry and Chemical Engineering, Harbin Institute of Technology, Harbin 150001, China

<sup>b</sup> Condensed Matter Science and Technology Institute and Department of Physics, School of Science, Harbin Institute of Technology, Harbin 150080, China

\*Corresponding authors

Email address: miaoyu\_che@hit.edu.cn (Y. Miao), sunye@hit.edu.cn (Y. Sun).

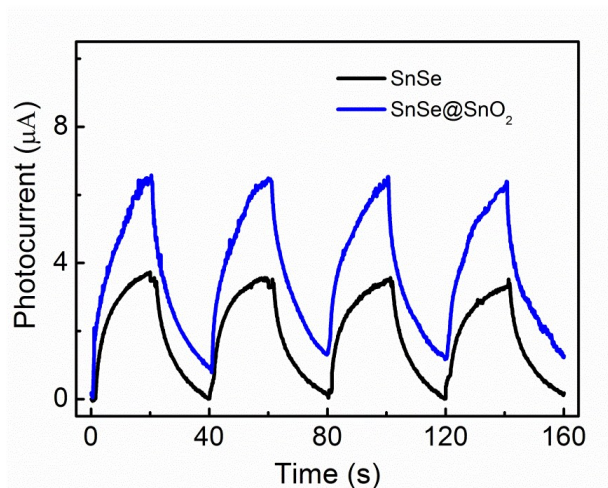

**Fig. S1** Transient photocurrent response of the SnSe@SnO<sub>2</sub> and SnSe samples.

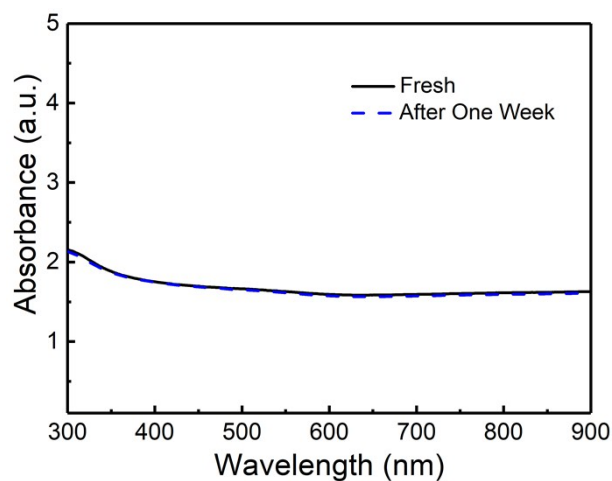

**Fig. S2** UV-vis-NIR absorption spectra of the fresh SnSe@SnO<sub>2</sub> NPs dispersion and the dispersion exposed to air at room temperature for one week.

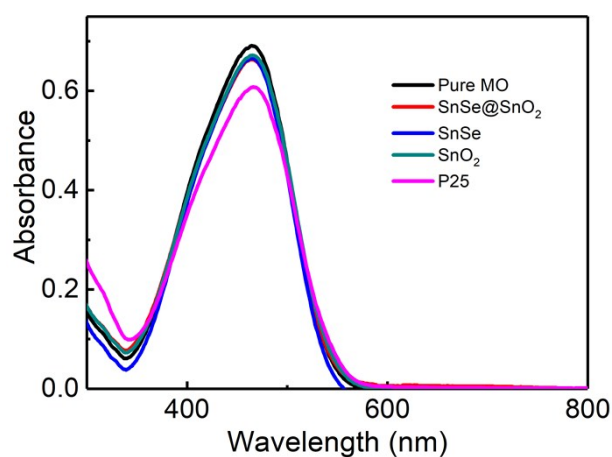

**Fig. S3.** UV-vis-NIR absorption spectra of pure MO solution, and MO solution in the presence of SnSe@SnO<sub>2</sub>, SnSe, SnO<sub>2</sub> and P25, measured in the dark.

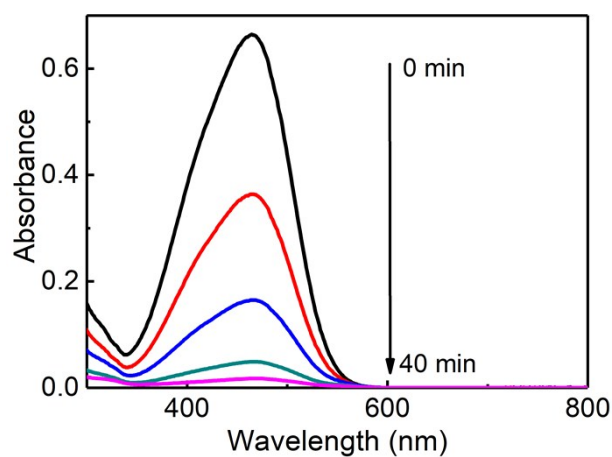

**Fig. S4** UV-vis-NIR absorption spectra of MO solution in the photocatalytic process of SnSe@SnO<sub>2</sub> under solar light irradiation.

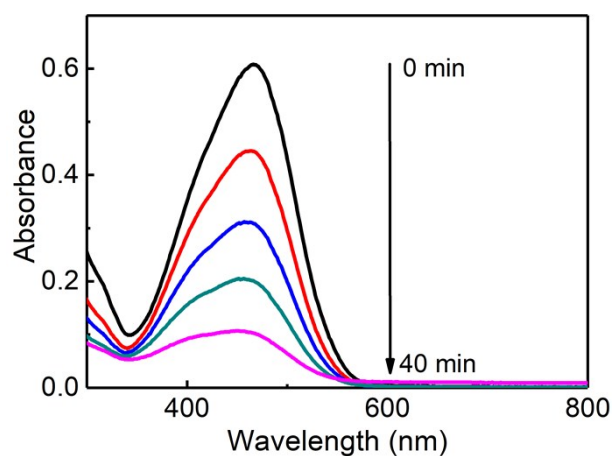

**Fig. S5** UV-vis-NIR absorption spectra of MO solution in the photocatalytic process of P25 under solar light irradiation.

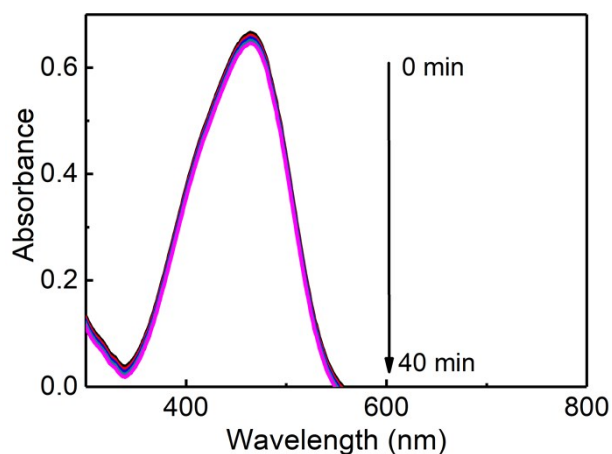

**Fig. S6** UV-vis-NIR absorption spectra of MO solution in the photocatalytic process of SnSe under solar light irradiation.

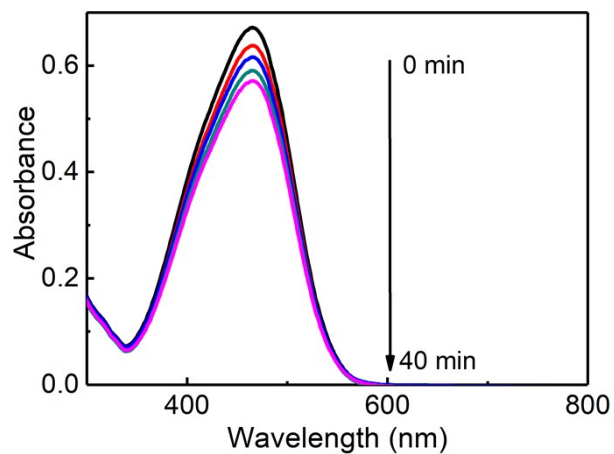

**Fig. S7** UV-vis-NIR absorption spectra of MO solution in the photocatalytic process of SnO<sub>2</sub> under solar light irradiation.

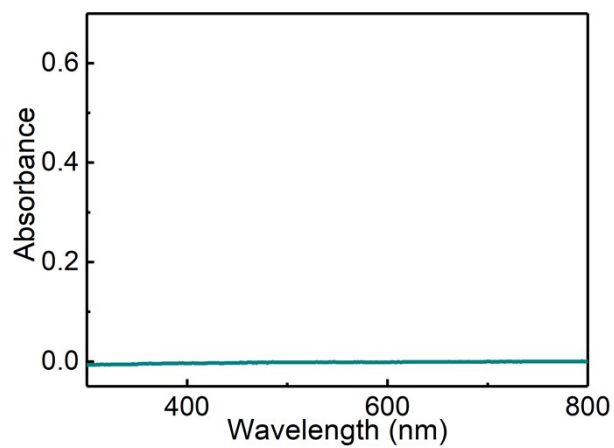

**Fig. S8** UV-vis-NIR absorption spectrum of the photothermal evaporated water.
